# Supplementary material
Source: publisher figshare collection journal article supplement (https://acs.figshare.com/ndownloader/files/4428838)
Supplement: Supplementary file 1 [file 4428838]

## Supporting Information

# Co-Self-Assembly of Binary Colloidal Crystals at the Air-Water Interface

Jie Yu, Qingfeng Yan\*, Dezhong Shen

*Department of Chemistry, State Key Laboratory of New Ceramics and Fine  
Processing, Tsinghua University, Beijing 100084, P. R. China*

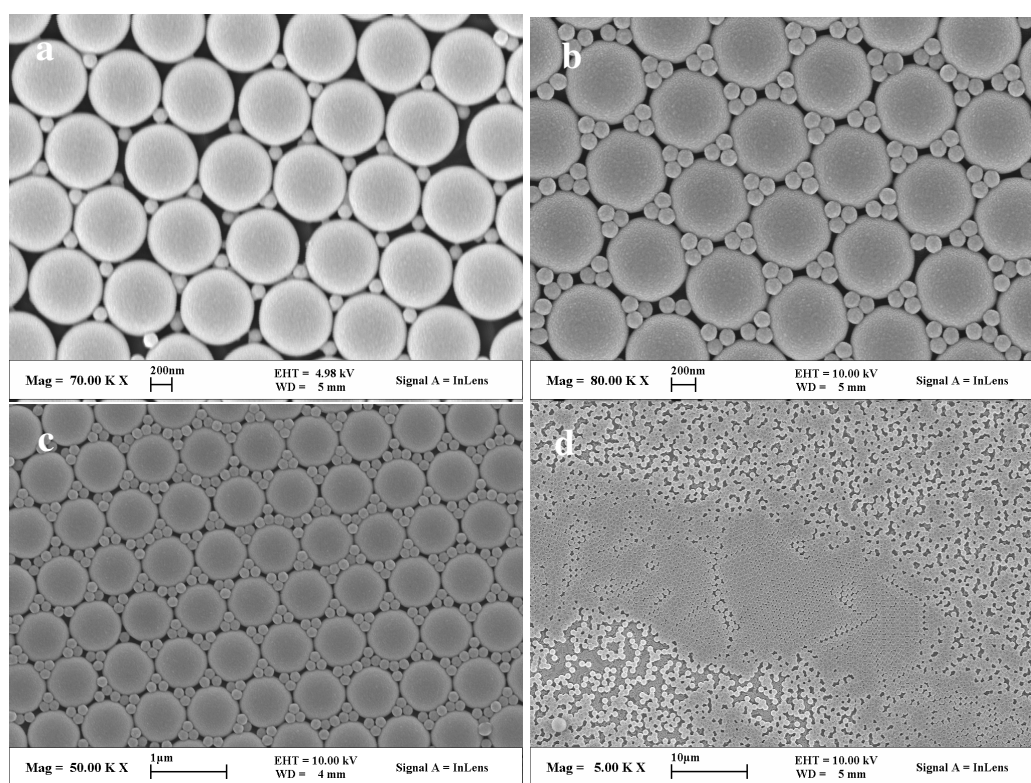

**Figure S1.** SEM images of BCC of large ( $R_L = 669$  nm) and small ( $R_S = 130$  nm) spheres with (a)  $\gamma_{S/L} = 0.194$ ,  $N_{S/L} = 2$ ; (b)  $\gamma_{S/L} = 0.194$ ,  $N_{S/L} = 4$ ; (c)  $\gamma_{S/L} = 0.194$ ,  $N_{S/L} = 8$ ; (d)  $\gamma_{S/L} = 0.194$ ,  $N_{S/L} = 12$ .
